# Supplementary material
Source: Research Square preprint supplement (doi:10.21203/rs.3.rs-8844584/v1)
Supplement: Supplementary file 1 [file 887ebff9df7c77d44fc67d82.docx]

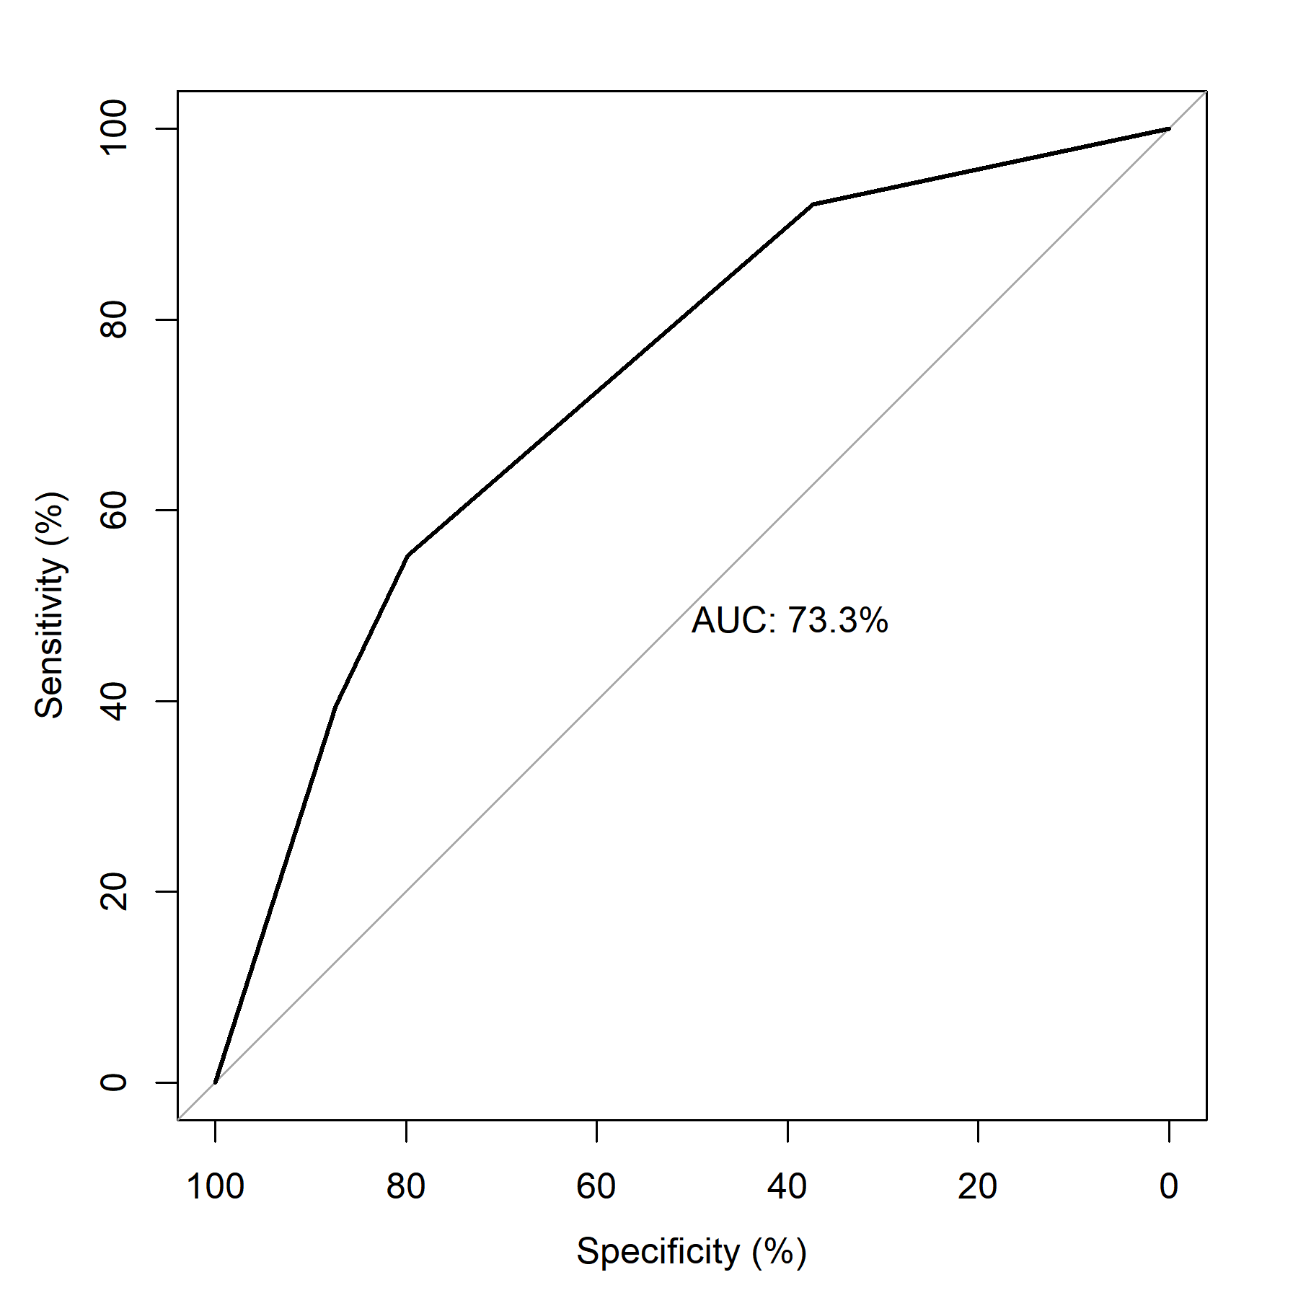


Supplementary Figure 1. Receiver Operating Characteristic (ROC) curve assessing the accuracy of the multivariate logistic regression model for predicting seropositivity for anti-*Schistosoma mansoni* antibodies (area under curve (AUC): 0.733) in indigenous individuals living in Southern Brazil.
